# Supplementary material
Source: publisher site journal article supplement (https://static.cambridge.org/content/id/urn:cambridge.org:id:article:S1047951119003305/resource/name/S1047951119003305supp002.docx)
Supplement: Supplementary file 1 [file S1047951119003305supp002.docx]

Video 1: Transthoracic short axis view of two dimensional transthoracic echocardiography shows a dilated left main coronary artery (white arrows, Ao; aorta).

Video 2: Right ventricular view of **echocardiogram shows a right ventricle of normal size and color Doppler shows forward flow into the apical region of right ventricle.(white arrows, RV; right ventricle, LV; left ventricle).**
